# Supplementary material for: Modification of the Forms of Self-Determined Regulation and Quality of Life after a Cardiac Rehabilitation Programme: Tennis-Based vs. Bicycle Ergometer-Based
Source: MDPI journal article supplement (doi:10.3390/ijerph18179207), 2021-08-31
Supplement: s1 [file s1]

**Table S1.** Descriptive Statistics and Reliability Analysis.

| <b>Variables</b>      | <b>M ± SD</b> | <b>α</b> | <b>Skewness</b> | <b>Kurtosis</b> |
|-----------------------|---------------|----------|-----------------|-----------------|
| BREQ-2 PRE            |               |          |                 |                 |
| Intrinsic             | 3,78 ± 0.92   | 0.81     | -0.64           | -0.27           |
| Identified            | 4.35± 0.79    | 0.82     | -1.14           | 0.44            |
| Introjected           | 3.14 ± 1.29   | 0.79     | -0.12           | -1.01           |
| External              | 2.19 ± 1.08   | 0.76     | 0.27            | -1.22           |
| Amotivation           | 1.65 ± 0.81   | 0.75     | 1.14            | 0.39            |
| BREQ-2 POST           |               |          |                 |                 |
| Intrinsic             | 4.32 ± 0.75   | 0.84     | -1.48           | 2.23            |
| Identified            | 4.58± 0.68    | 0.74     | -2.58           | 8.80            |
| Introjected           | 3.15 ± 1.38   | 0.78     | -0.34           | -1.06           |
| External              | 1.89 ± 1.06   | 0.82     | 0.95            | -0.40           |
| Amotivation           | 1.58 ± 0.74   | 0.64     | 1.29            | 0.87            |
| Q. LIFE PRE           |               |          |                 |                 |
| Perceived health      | 2.25 ± 0.70   | 0.82     | 0.59            | -0.09           |
| Sleep and rest        | 2.17 ± 0.94   | 0.87     | 0.62            | -0.04           |
| Emotional behaviour   | 2.16 ± 1.02   | 0.89     | 0.41            | -0.95           |
| Future projects       | 2.29 ± 1.02   | 0.76     | 0.34            | -0.92           |
| Movility              | 2.10 ± 0.88   | 0.90     | 0.84            | 0.47            |
| Social relations      | 2.00 ± 0.77   | 0.84     | 0.66            | -0.45           |
| Alert behaviour       | 2.02 ± 1.01   | 0.89     | 1.24            | 1.14            |
| Communication         | 1.75 ± 0.94   | 0.95     | 1.71            | 2.83            |
| Leisure and work time | 2.36 ± 0.97   | 0.90     | 0.30            | -0.70           |
| Q. LIFE POST          |               |          |                 |                 |
| Perceived health      | 1.72 ± 0.53   | 0.83     | 1.14            | 1.24            |
| Sleep and rest        | 1.70 ± 0.68   | 0.75     | 0.95            | 0.44            |
| Emotional behaviour   | 1.75 ± 0.85   | 0.86     | 0.91            | -0.44           |
| Future projects       | 1.60 ± 0.73   | 0.78     | 1.44            | 1.56            |
| Movility              | 1.47 ± 0.57   | 0.89     | 1.54            | 2.53            |
| Social relations      | 1.53 ± 0.59   | 0.86     | 1.53            | 1.75            |
| Alert behaviour       | 1.68 ± 0.78   | 0.82     | 1.41            | 1.73            |
| Communication         | 1.41 ± 0.74   | 0.95     | 2.41            | 6.20            |
| Leisure and work time | 1.79 ± 0.70   | 0.85     | 0.83            | 0.09            |
